# Supplementary material for: Managing Drought Related Financial Risks with Water Futures
Source: Research Square preprint supplement (doi:10.21203/rs.3.rs-8275145/v1), 2025-12-10
Supplement: Supplementary file 1 [file 040e0972cbd9cfff961fde3a.docx]

**Supplementary Materials**

**Contents:**

1. Supplementary Figures S1
2. Supplementary Figures S2
3. Supplementary Figures S3
4. Supplementary Figure S4


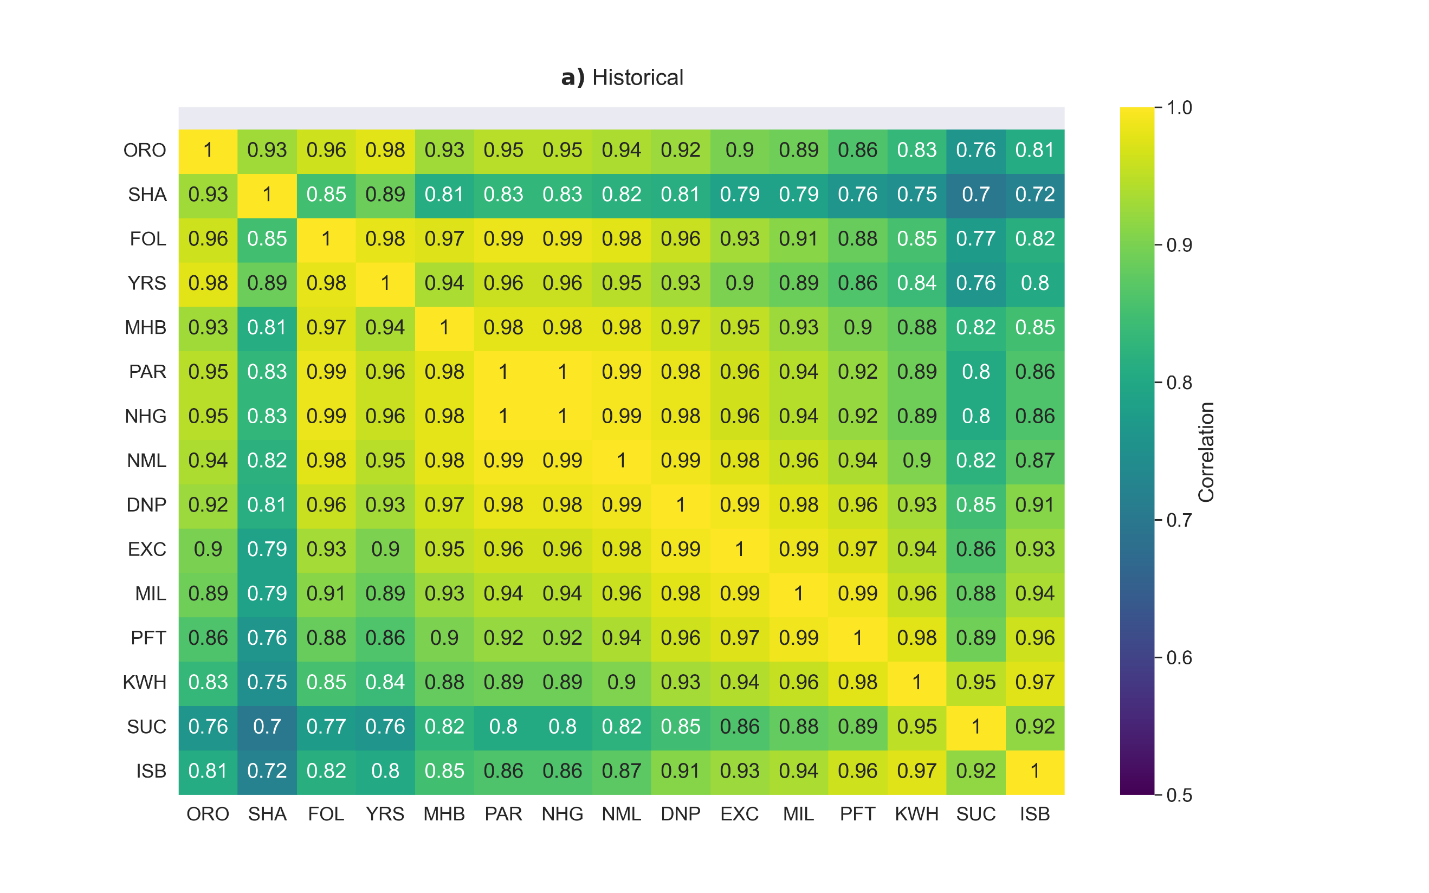


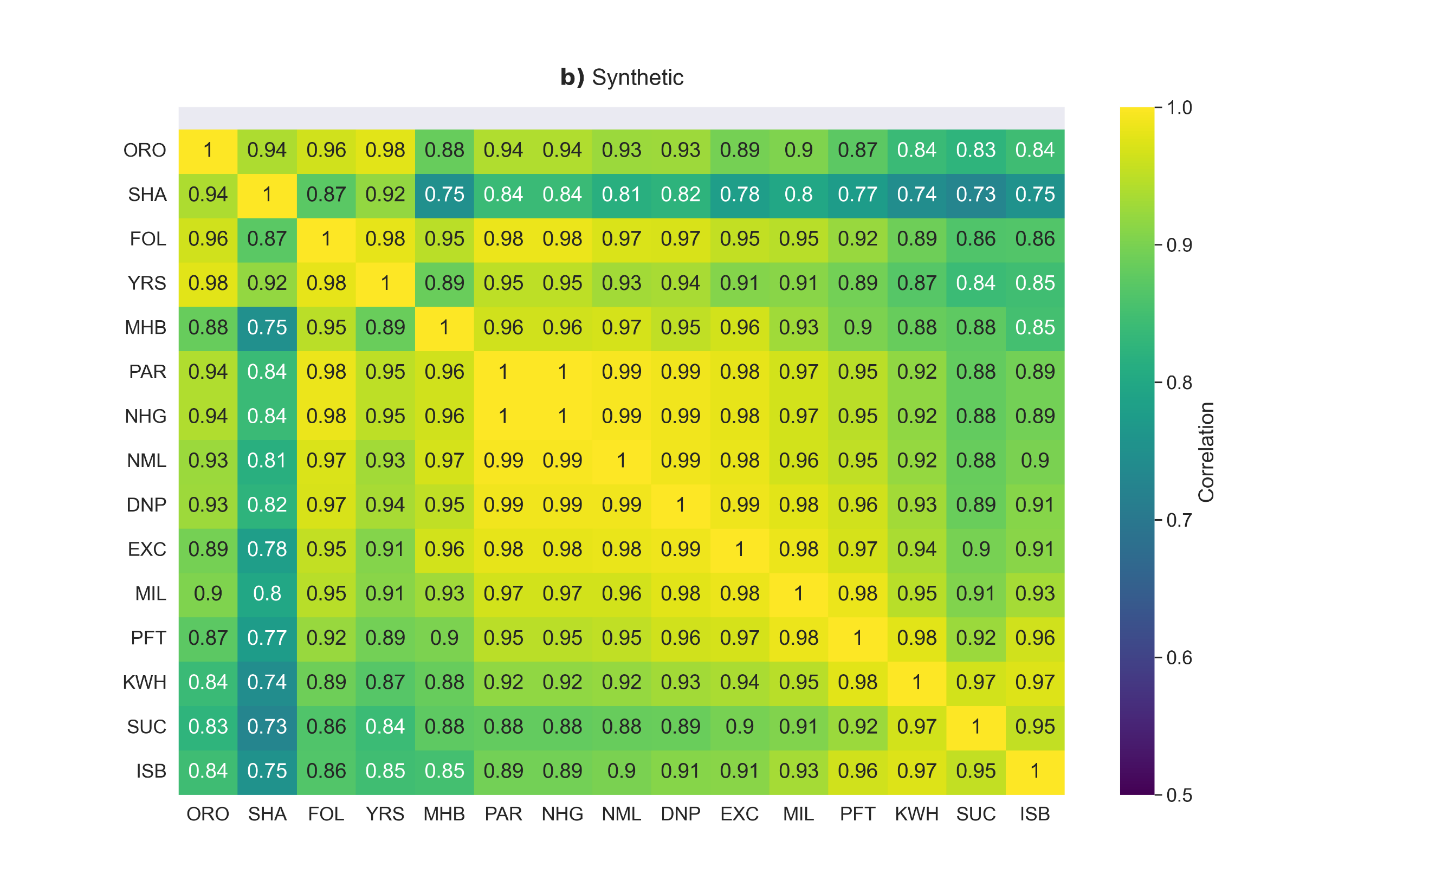


**Supplementary Figure S1.** (a) historical and (b) synthetic annual correlations across system inflow locations.


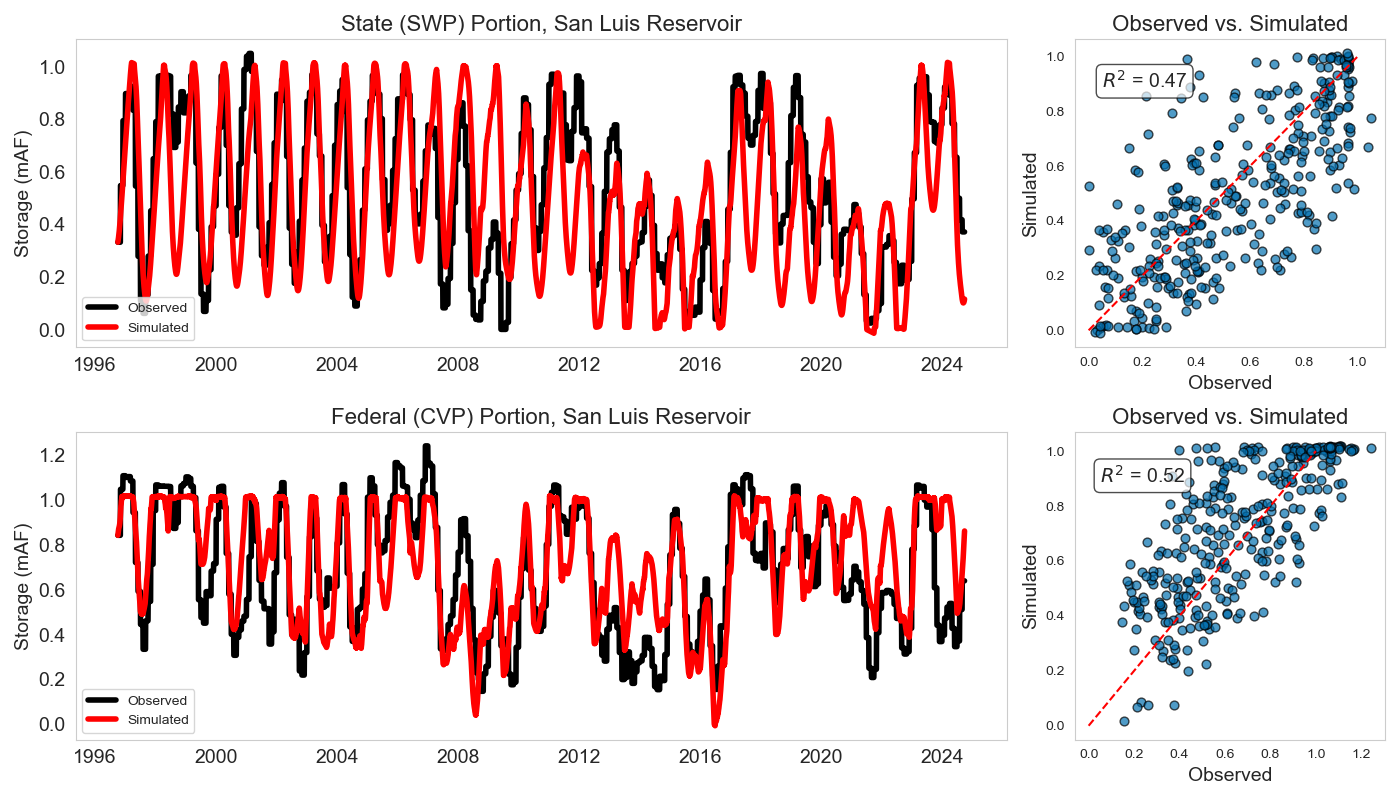


**Supplementary** **Figure S2.** Comparison of the observed and simulated storage for the state (SWP) and federal (CVP) portions of the San Luis Reservoir from October 1996 to September 2024: daily time series (left), and monthly storage levels with R² (right).


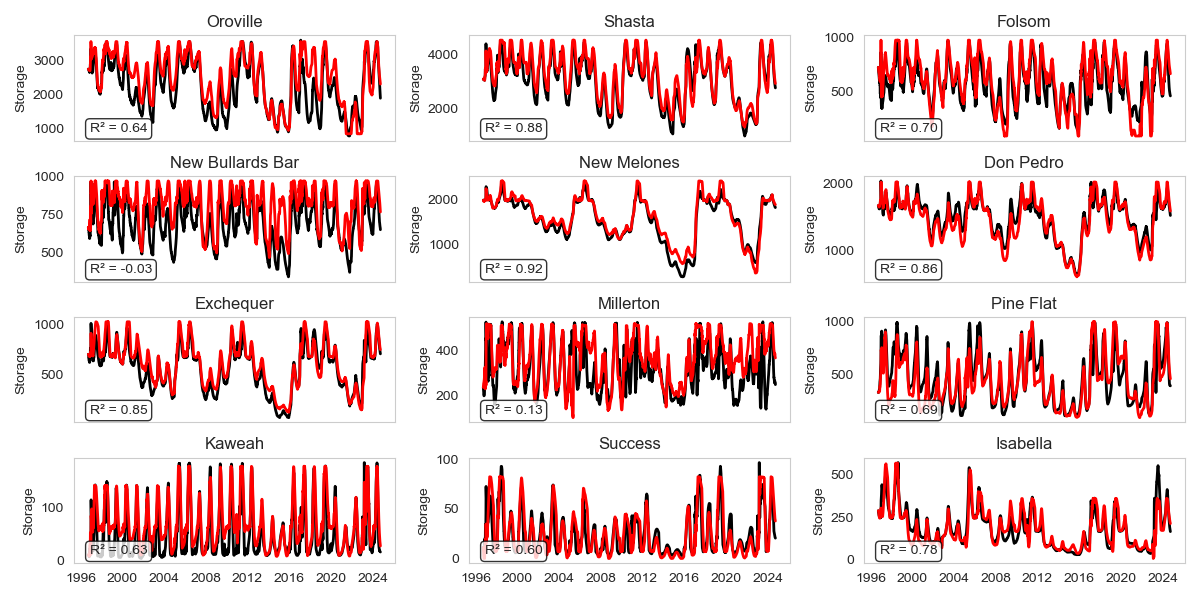


**Supplementary** **Figure S3**. Comparison of observed and simulated daily time series for the 12 major surface water reservoirs modeled in CALFEWS (excluding San Luis Reservoir) from October 1996 to September 2024.

***
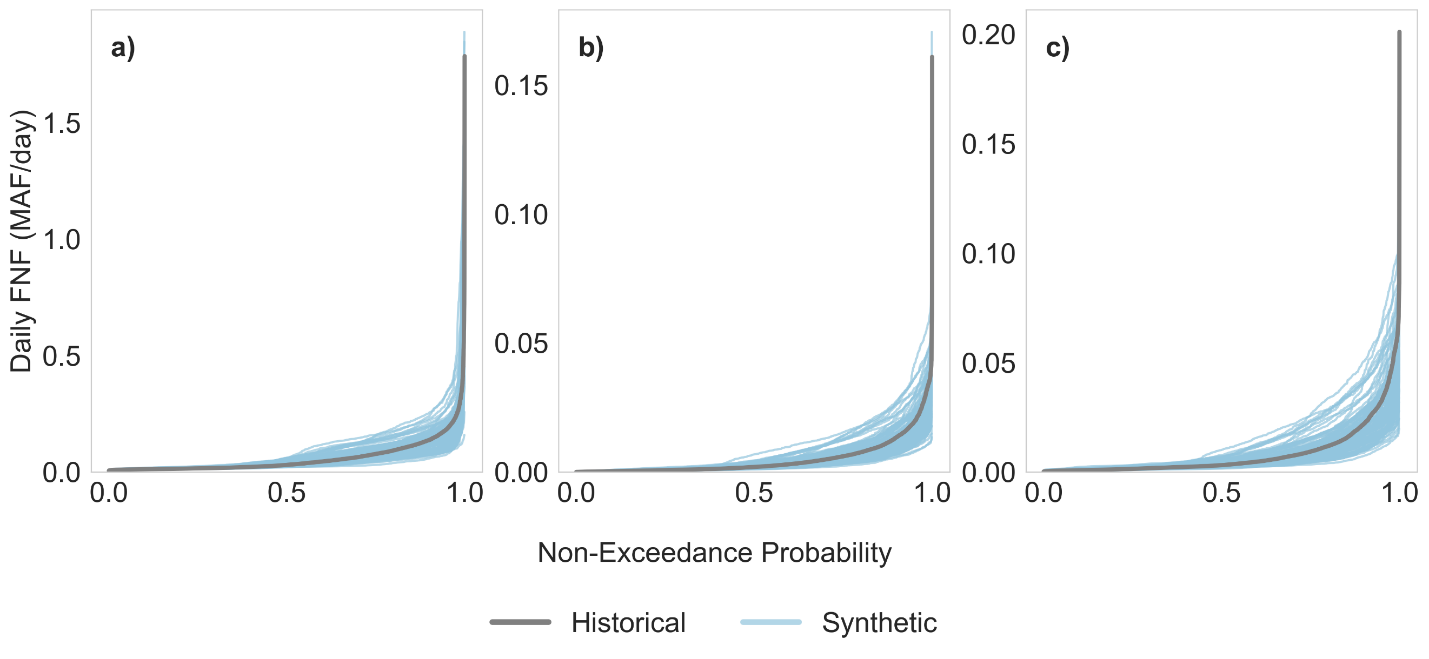
***

**Supplementary** **Figure S4. Daily FNF Distribution for Historical and Synthetic Datasets.** Each subfigure displays the non-exceedance curves for daily FNF, with distributions presented for the following regions: (a) the cumulative surface water reservoirs north of Millerton Lake, comprising Shasta, Oroville, New Bullards Bar, Folsom, New Melones, Don Pedro, and McClure; (b) Millerton Lake; and (c) the cumulative surface water reservoirs south of Millerton Lake, including Pine Flat, Kaweah, Success, and Isabella. The label "Historical" corresponds to the 119-year historical FNF, while "Synthetic" refers to the 100 one-year synthetic flow scenarios.
